# Supplementary material for: Histone H3.3 lysine 9 and 27 control repressive chromatin at cryptic enhancers and bivalent promoters
Source: PubMed Central journal article supplement (PMC11364623; doi:10.1038/s41467-024-51785-w), 2024-08-30
Supplement: 41467_2024_51785_MOESM3_ESM.pdf [file 41467_2024_51785_MOESM3_ESM.pdf]

## **Description of Additional Supplementary Files**

File Name: Supplementary Data 1

Description: The file contains sequences of single-guide RNAs and single-strand oligonucleotides used in CRISPR-Cas9 editing experiments to introduce K27A and K9A mutations in the endogenous *H3f3b* locus.

File Name: Supplementary Data 2

Description: The file contains sequences of forward and reverse primers used for real-time quantitative PCR (sheet #1) and ChIP-qPCR (sheet #2) experiments.
